# Supplementary material for: Chinese Herbal Formula Huo-Luo-Xiao-Ling Dan Protects against Bone Damage in Adjuvant Arthritis by Modulating the Mediators of Bone Remodeling
Source: Hindawi journal article supplement (doi:10.1155/2013/429606), 2013-01-01

Supplementary Fig 1

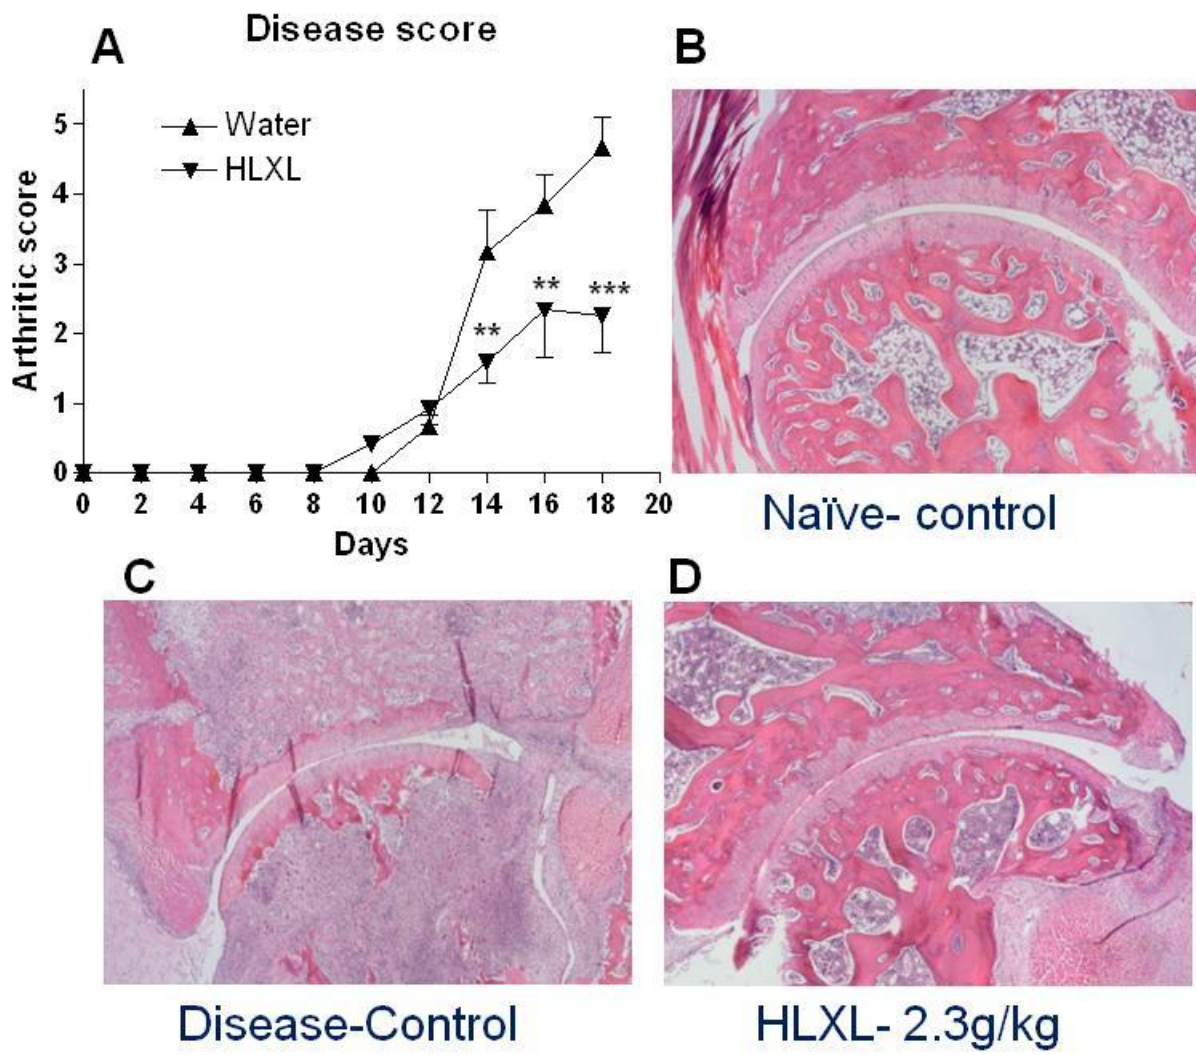

## Supplementary Figure 2

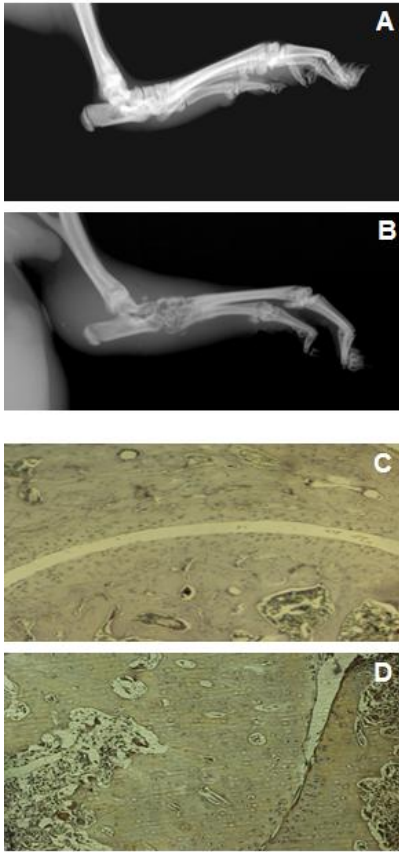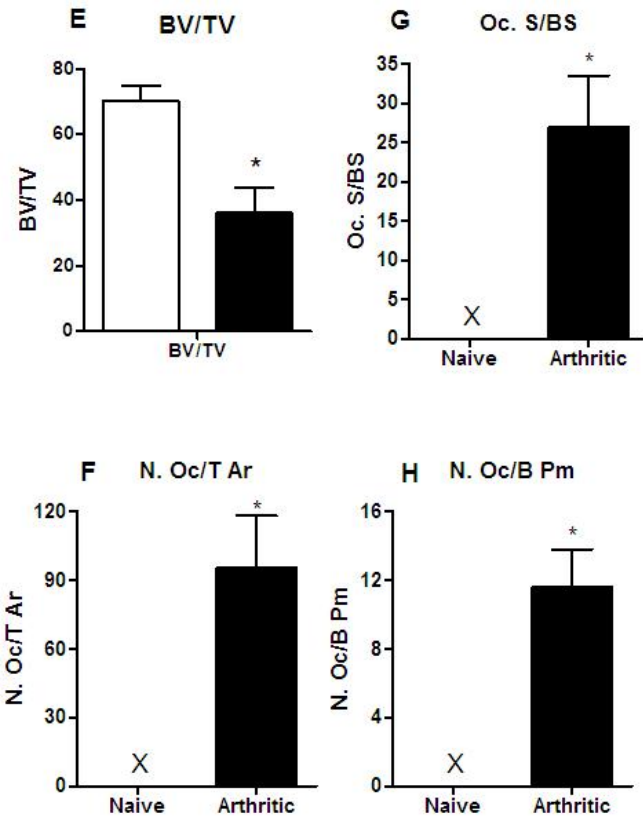

Supplement: f1 [file 429606.f1.pdf]
